# Supplementary material
Source: bioRxiv or medRxiv preprint supplement (https://www.biorxiv.org/highwire/filestream/125375/field_highwire_adjunct_files/0/414607-1.pdf)
Supplement: Supplementary file [file 414607-1.pdf]

chr17:30368704-30368854

\* chr17:30,368,796 (-)

CATGATTCAAAGGAAGAAATTTTCCCTCATATATATCTACTGTTGATAAACTCTGGTTCAGTGAATCACTCCCTCTGATTTCTATCCATCCCTCTTCACTATTTCTGGGAGGATAGGTCACATCAGGGATACTTCTCCACAATCTCACTG  
CATGATTCAAAGGAAGAAATTTTCCCTCATATATATCTACTGTTGATAAACTCTGGTTCAGGGAATCCCTCCCTCTGATTTCTATCCATCTGTTAAGTTTTTTAGTAACTAGACGGAAATGAGACCGCCCAAGGCAAGCGAGGGTC  
TGGCGTATCGCCATCTGGAGGAGTTCCCTTCCCGCTGGCCCAACAACATCTCTTCCCTATTTCTGGGAGGATAGGTCACATCAGGATACTTCTCCACAATCTCACTG

chr17:9744887-9745037

Provirus

\* chr17:9,744,973 (-)

TGTGCAATCTCCAGAAAGCCTGATAAATACACAGCAGATGTAGCCAGCCTTTAGAACTTGAAGTCTTTTAAAAACATTACTTTGTTTCATAGTAATCACTCCCTTTTAGTACTTTGTAATATTTTTCATGTTCTGTTTTTTTT  
TGTGCAATCTCCAGAAAGCCTGATAAATACACAGCAGATGTAGCCAGCCTTTAGAACTTGAAGTCTTTTAAAAACATTACTTTGTTTCATAGTAATCACTCCCTTTTAGTACTTTGTAATATTTTTCATGTTCTGTTTTTTTT  
GTGAGGTTGTTGACAGGAATTCAGCCATTTGGCGTATCCGCCATCTTGGAGGTTTCCCTTCCCGCTGGCCCAACAACCTTGTTCATAGTAATCACTCCCTTTTAGTACTTTGTAATATTTTTCATGTTCTGTTTTTTTT

chr19:9813589-9813739

\* chr19:9,813,667 (-)

GTGAGCCATAAATTTAATAGAATCTAAAAATATTTAAGGTACATACCATTTTGAGTTCCTCATCTGTTACTATGCTATACAAACAGCCGTGTGGAGAAATTAACATTTCTGGTTCCTCAGTGCCTTTGGGACTCTTCACTT  
GAAGCCATAAATTTAATAGAATCTAAAAATATTTAAGGTACATACCATTTTGAGTTCCTCATCTGTTACTTGTAAAGTTTTTTAGTAACTAGACGGAAATGAGACCGCCAAAGCAAGCGAGGGTCCAAAGCAGCCACT  
GTGACAGGAATTCAGCCATTTGGCGTATCCGCCATCTTGGAGGTTTCCCTTCCCGCTGGCCCAACAACATCTGTTTCATAGTAATCACTCCCTTTTAGTACTTTGTAATATTTTTCATGTTCTGTTTTTTTT

chr20:14974909-14975059

\* chr20:14,974,979 (+)

ACATCTTAAATAGGAATGTTGGTTAAGTGAATGACATAAATGGAAGTTTTCGCAAAATGAAAAATACAAAAACGGTTATCAGGTTTTGGTACATTTAGTACTTTTCAAGAACTGACATAAATAGTTTGGCGGTGAGATTAG  
CTTAAATAGGAATGTTGGTTAAGTGAATGACATAAATGGAAGTTTTCGCAAAATGAAAAATGTTGGGCGCAGCCGGGAGGAACTCCTCAAGATGGCGGATACGCCAAATGGCTGAAGTTCTGTCAACC  
TGTCTTGGACCTCGCTGCCTTGGCGTCTCATTTCCGCTAGTTACTAAAAAACTTAAACAATAAATACAAAAACGGTTATCAGGTTTTGGTACATTTAGTACTTTTCAAGAACTGACATAAATAGTTTGGCGGTGAG

chr20:12058377-12058527

\* chr20:12,058,450 (+)

TAACAAGTAGGCTGTTAGTCTTGGAGATCCCTTATCAGTAATGAGTTTGTATTTTTTAACTGCTTCTAATTTTTTCTTCTTAAATTTGGCTTCAACGTTTGGATATGATGCTCTGGCCATCAATCTTGTGATTTATCTT  
TAACAAGTAGGCTGTTAGTCTTGGAGATCCCTTATCAGTAATGAGTTTGTATTTTTTAACTGCTTCTGTTGGGCGCAGCCGGGAGGAACTCCTCAAGATGGCGGATACGCCAAATGGCTGAAGTTCTGTCAACC  
ATCTGTTTGGACCTCGCTGCCTTGGCGTCTCATTTCCGCTAGTTACTAAAAAACTTAAACAATAAATACAAAAACGGTTATCAGGTTTTGGTACATTTAGTACTTTTCAAGAACTGACATAAATAGTTTGGCGGTGAG

chr20:16677067-16677217

\* chr20:16,677,142 (+)

GTTATATAGCAAAACAAAAAATGTTTATCTGCTTTAGTAAATGGGAAGAGAGTCTTCTAAACTAAATAGTTTCACAGTGAATTTAGAAAAATATAATACCAAAGTCAGAGAAACATCAGAAAAACGCAAGTTGGAAAAATACAT  
GTTATATAGCAAAACAAAAAATGTTTATCTGCTTTAGTAAATGGGAAGAGAGTCTTCTAAACTAAATAGTTTGGGCGCAGCCGGGAGGAACTCCTCAAGATGGCGGATACGCCAAATGGCTGAAGTTCTGTCAACC  
CTGTTTGGACCTCGCTGCCTTGGCGTCTCATTTCCGCTAGTTACTAAAAAACTTAAACAATAAATGTCACAGTGAATTTAGAAAAATATAATACCAAAGTCAGAGAAACATCAGAAAAAAGCAAGTTGGAAAAATACAC

chr21:9814285-9814435

\* chr21:9,814,350 (+)

TGTTCCATATGCTTCTATAAATCTAAAACTCTCTATAAAGATGTTAAATTTAAAAAATACCTATCAGGTAATCTATAGGATTTGCTGTAATAATCAAGTGAATATAAATAAATAAATAAATAAATAAATAAATAAAT  
TGTTCCATATGCTTCTATAAATCTAAAACTCTCTATAAAGATGTTAAATTTAAAAAATACCTATTTGGGCGCAGCCGGGAGGAACTCCTCAAGATGGCGGATACGCCAAATGGCTGAAGTTCTGTCAACC  
TGGACCTCGCTGCCTTGGCGTCTCATTTCCGCTAGTTACTAAAAAACTTAAACAATAAATCAGGTAATCTATAGGATTTGCTG

chr21:7250000-7250150

\* chr21:7,250,064 (-)

TGCTCTACTCTGGCTTTGCTGAAGTATCCTCCATCTCTGGATTTCAATCACTCTTACCAGGACCTCCCAAAACAGGGAGGTTACGTCTAGGAACACAGGGAGGAGGAGGATGCCAAGACTACTCTCTCTCTAGGACCT  
TGCTCTACTCTGGCTTTGCTGAAGTATCCTCCATCTCTGGATTTCAATCACTCTTACCAGGACCTCCCAAAACAGGGAGGTTACGTCTAGGAACACAGGGAGGAGGAGGATGCCAAGACTACTCTCTCTCTAGGACCT  
TTGGCGTATCCACATCTTGGAGGTTTCCCTTCCCACTGGCCCAACAACAGGACCTCCCAAAACAGGGAGGTTACGTCTAGGAACACAGGGAGGAGGAGGATGCCAAGACTACTCTCTCTCTAGGACCT

chr22:45482993-45483143

\* chr22:45,483,070 (-)

CCAGTGGAGGGGAGGTTGGTTGAAGATACTGTTAAACACTTGAATTAACAAAGTGAATTTCCCTGGCAGGCTTATGTTAACTGATGAGAGGCAAGGATCCATGGGCTTCAAGAACTGACTTGGCCCTGAGAGAACAGGCCAC  
CCAGTGGAGGGGAGGTTGGTTGAAGATACTGTTAAACACTTGAATTAACAAAGTGAATTTCCCTGGCAGGCTTATGTTAACTGATGAGAGGCAAGGATCCATGGGCTTCAAGAACTGACTTGGCCCTGAGAGAACAGGCCAC  
TCCCTTCCCGCTGGCCCAACAACGCTTATATGTTAACTGATGAGAGGCAAGGATCCATGGGCTTCAAGAACTGACTTGGCCCTGAGAGAACAGGCCAC

chr22:57676984-57677134

\* chr22:57,677,068 (-)

ATGATTCACCAAGGCTCTGGGAAGAAAGAACTGTGTACATCGAGGCATCGGTGATAGTGAAGAAGTTTCAAAAGATATAATGAGACGAGGAAAGGGAAGAGAGATTCCGGTCAAGCACTCCGTCGCCCTTAAGAAATGCTGT  
ACCAAGGCTCTGGGAAGAAAGAACTGTGTACATCGAGGCATCGGTGATAGTGAAGAAGTTTCAAAAGATATAATGTTAAGTTTTTTAGTAACTAGACGGAAATGAGACCGCCAAAGGCT  
CCTTCCCGCTGGCCCAACAATAATGAGACGAGGAAAGGGAAGAGAGATTCCGGTCAAGCACTCCGTCGCCCTTAAG

chr26:27059664-27059814

\* chr26:27,059,757 (+)

GGAGCTGAATAAAGTACTTGGACTCCATGCATGTTTTGCAACTTGCTACGATTTATATGATTTTTTAAATAATTTTTTAAATAGTTTTTCAAGAAATATAATCCAAATTTGAAATACAACCAAAATGTAATTTGTAAT  
ATAAAGTACTTGGACTCCATGCATGTTTTGCAACTTGCTACGATTTATATGATTTTTTAAATAATTTTTTAAATAGTTGTTGGGCGCAGCCGGGAGGAACTCCTCAAGATGGCGGATACGCCAAATGGCTGAAGTTCTGTCAACCCTCCAC  
GAGGGTCTGCAATAAAGCTGTTCTGGACCTCGCTGCCTTGGCGTCTCATTTCCGCTAGTTACTAAAAAACTTAAACAATAATGTTTCAAGAAATATAATCCAAATTTGAAATACAACCAAAATGTAATTTGTAAT

chr26:28072398-28072548

\* chr26:28,072,465 (-)

GGGAGAGTTTTTAAACACATGGATTTCCAGGCTTCCATCTAGTGAACGAGAATCTTAGGGAATAGGCTTAAAGTTGGGATTTGATTTTTTCAAACTCCCTGAGTGGGAATTTACTGCTGGTGGTGGAGGAGTACAGGCTGGATT  
GTTTTAAACACATGGATTTCCAGGCTTCCATCTAGTGAACGAGAATCTTAGGGAATAGTTAAGTTTTTTAGTAACTAGACGGAAATGAGACCGCCAAAGCAAGCGAGGTTCCAAAGAACAGATTTTATTGACGGC  
CTTACAGCATTGGCGTATCCGCCATCTTGGAGGTTTCCCTTCCCGCTGGCCCAACAACATGAGGCTTAAAGTTGGGATTTGATTTTTTCAAACTCCCTGAGTGGGAATTTACTGCTGGTGGTGGAGGAGTACAG

chr26:35982371-35982521

Provirus

\* chr26:35,982,438 (+)

CCTGGTGGCTCAGTTAAGCATCTGACTCTTGGTTTCAGCTCACATCATGATCTCAGGGTCTGAGACTGAGCCCAATGGGAGCTCCATGCTATTGGGAGTCTGCTAAAAGTTTCTCCCTCTCCCTCTGCTGCTCATTC  
CCTGGTGGCTCAGTTAAGCATCTGACTCTTGGTTTCAGCTCACATCATGATCTCAGGGTCTGAGTTGTTGGGCGCAGCCGGGAGGAACTCCTCAAGATGGCGGATACGCCAAATGGCTGAAGTTCTGTCAACCCTCCAC  
TCTTGGACCTCGCTGCCTTGGCGTCTCATTTCCGCTAGTTACTAAAAAACTTAAACAATAAATGAGGCTTAAAGTTGGGATTTGATTTTTTCAAACTCCCTGAGTGGGAATTTACTGCTGGTGGTGGAGGAGTACAG

chr27:44066867-44067018

\* chr27:44,066,943 (-)

ATACAAGTACTCCAGCAGTGCATGGCAAGGAGTAAATATTCAATAAACATAGTTTTTTTTAAAGTTTGAATCATAGCTCTTGAATCTGGGCTTCTCTGAGCTTTCCCTTGGATGCATTTGTTTTTGTGTTTTTACAA  
GGTGACAGAACTTACCCATTTGGCGTATCCGCCATCTTGGAGGTTTCCCTTCCCGCTGGCCCAACAATAATGAGCTTGTAAATCTGGGCTTCTCTGCTGCTTTCCCTTGTGTTTTTTTT

chr28:11031827-11031977

\* chr28:11,031,931 (+)

GGGGTGAATCCCTGGGCTGCTTCTCAGCTCAAAGTGGTCTCTGTGTACAGTGTCTTAACTATGGCTCAGCCCAAACTTGGGCTCTGAAACAGTGTGAGGTTAGGCTTGGTGTCTTCAAGTTTGGGCTTGGGTGA  
TCCCTGGGCTGCTTCTCAGCTCAAAGTGGTCTCTGTGTACAGTGTCTTAACTATGGCTCAGCCCAAACTTGGGCTCTGAAACAGTGTGTTGGGCGCAGCCGGGAGGAACTCCTCAAGATGGCGGATACGCC  
GCCAGGGTGGCTGCAATAAAGCTGTTCTTGGACCTCGCTGCCTTGGCGTCTCATTTCCGCTAGTTACTAAAAAACTTAAACAATAAATGAGGCTTAAAGTTGGGATTTAGGCTTGGTGTCTTCAAGTTTGGTGTGGGTGA
